# Supplementary material for: Controlled multistep synthesis in a three-phase droplet reactor
Source: PubMed Central journal article supplement (PMC4024758; doi:10.1038/ncomms4777), 2014-05-06
Supplement: ncomms4777-s1.pdf [file ncomms4777-s1.pdf]

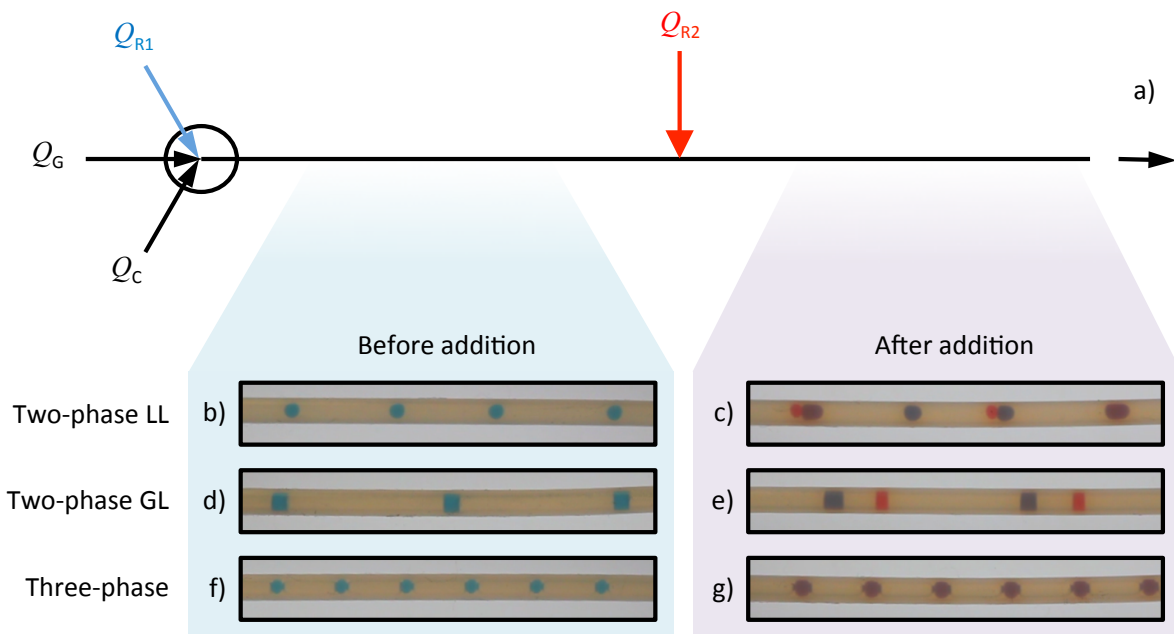

**Supplementary Figure 1 | Droplet flow before and after solvent addition.** (a) Schematic showing experimental setup used to observe the injection of red-dyed ODE into blue-dyed slugs or droplets of ODE: a two- or three-phase stream of blue-dyed ODE slugs/droplets is first generated by combining ODE/PFPE, ODE/Ar or ODE/PFPE/Ar in a passive mixer, and a stream of red-dyed ODE is then injected at a rate  $Q_{R2}$  into the flowing droplets using a T-junction. (b-g) Representative images of the flowing droplets before and after solvent addition for the liquid/liquid (LL), gas/liquid (GL) and gas/liquid/liquid (three-phase) flows.

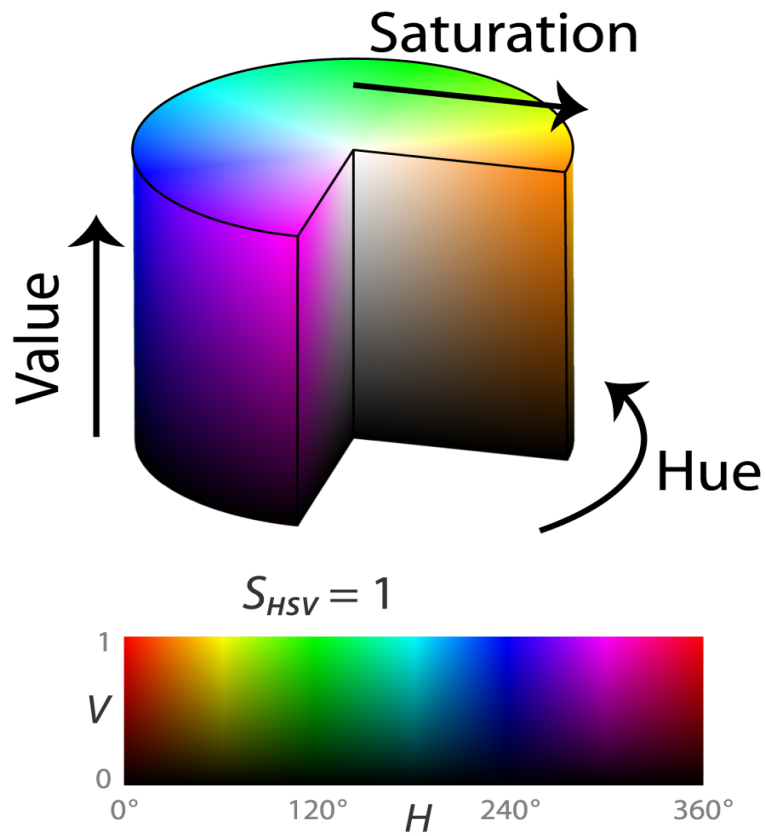

**Supplementary Figure 2 | HSV colour space.** A three-dimensional cut-away representation of the Hue-Saturation-Value (HSV) colour space, plus a two-dimensional plot in which S is held constant while H and V are varied. Image modified from “Hsl-hsv models.svg” by Jacob Rus. This file is licensed under the Creative Commons Attribution-Share Alike 3.0 Unported licence (<http://creativecommons.org/licenses/by-sa/3.0>), via Wikimedia Commons.

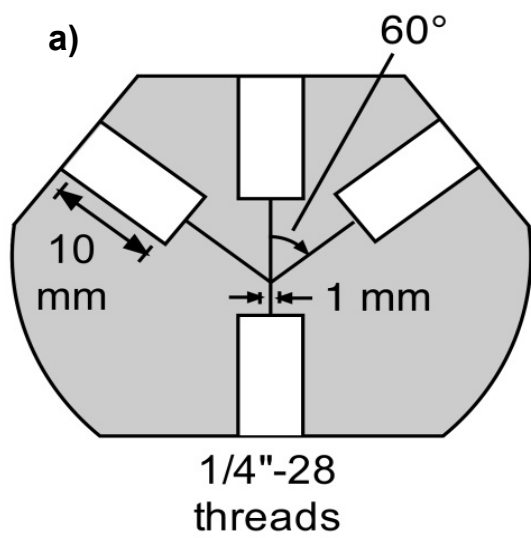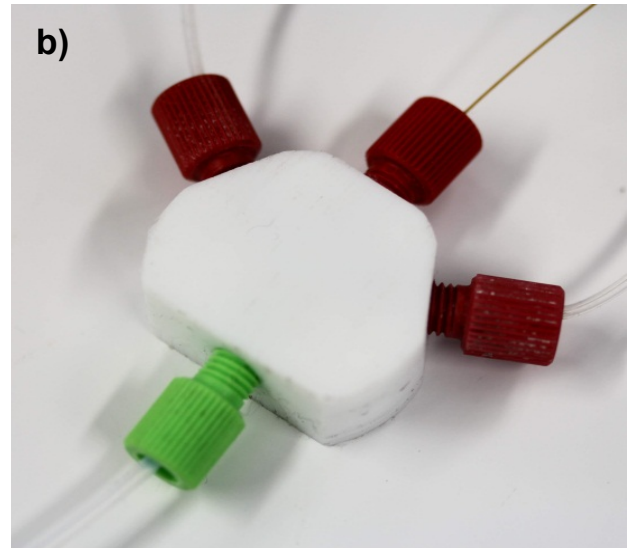

**Supplementary Figure 3 | Structure of droplet generators.** Schematic (a) and photograph (b) of a micro-machined PTFE junction used for generating two- and three-phase flows. Two-phase flows were generated by setting the flow rate of the unwanted fluid to zero.

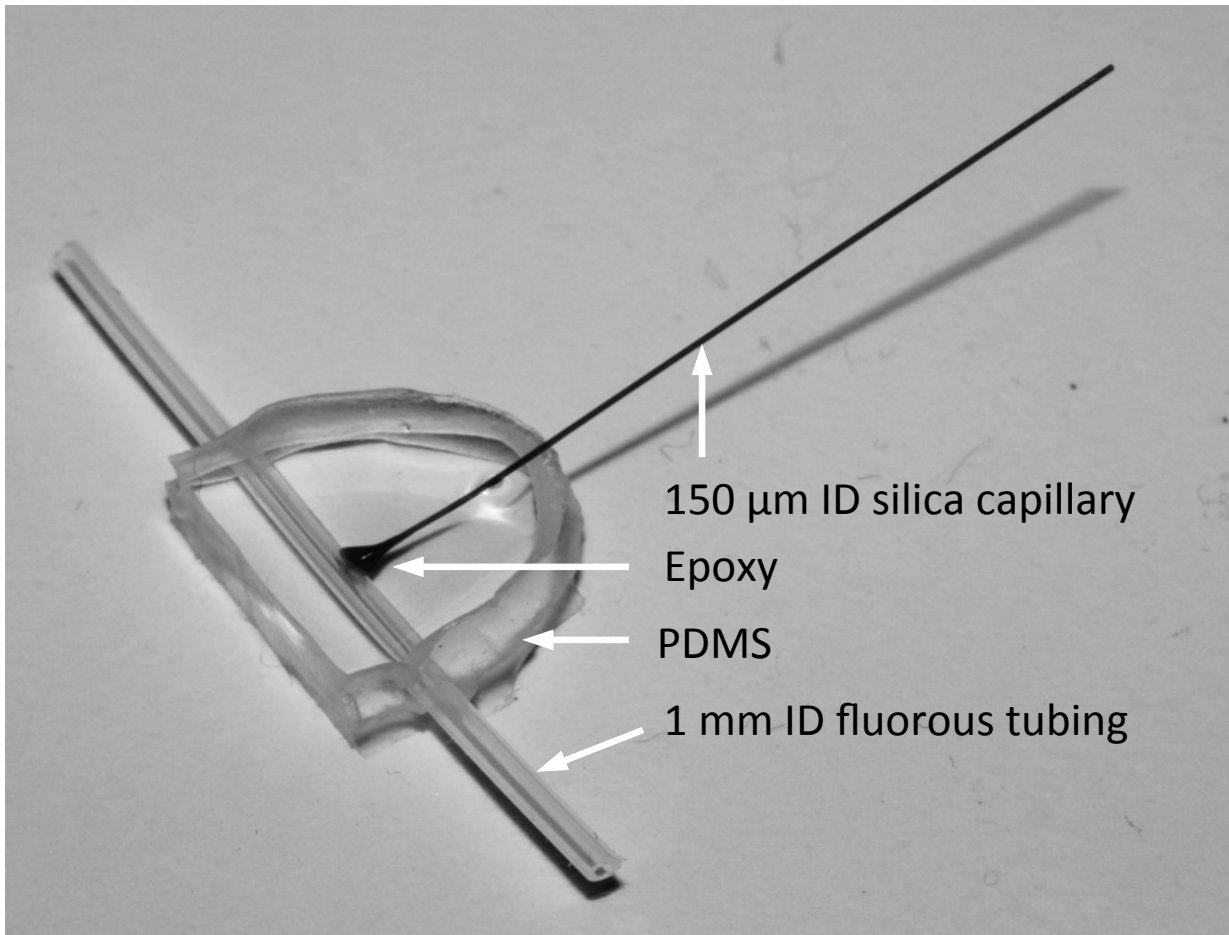

**Supplementary Figure 4 | T-junction used for reagent addition.** Photograph of a T-junction, comprising an FEP main channel through which the droplet stream flows and a silica side channel for injecting additional reagent. The T-junction is embedded in a slab of PDMS for support.

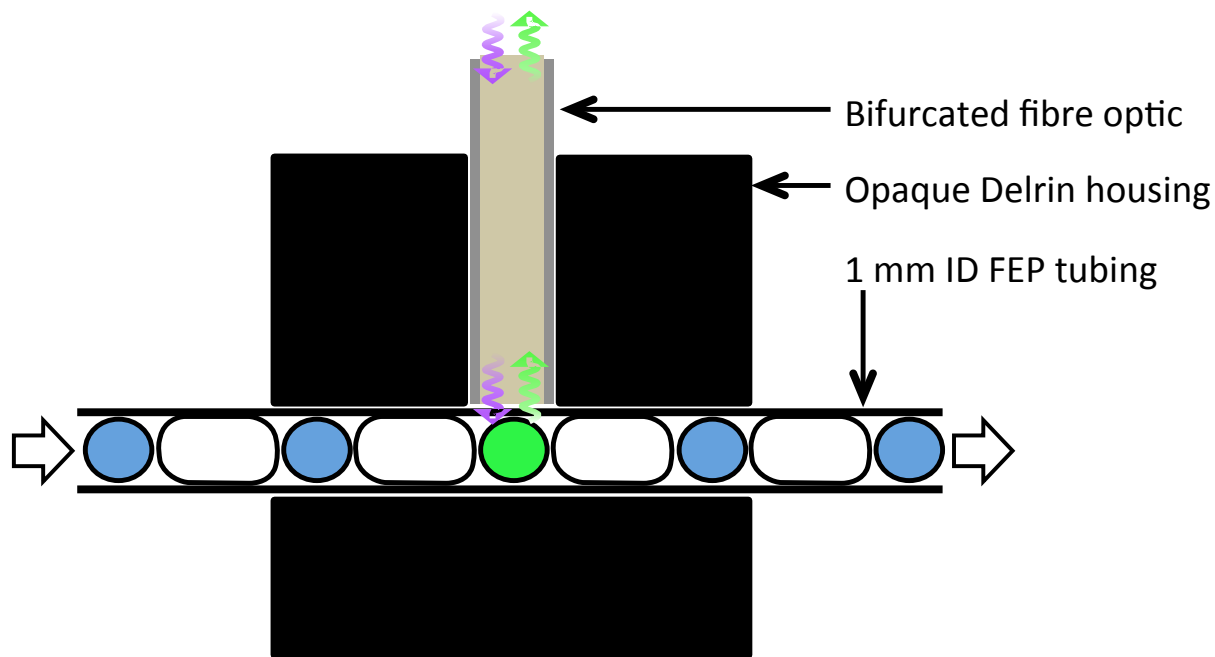

**Supplementary Figure 5 | Schematic of flow-cell.** The flow-cells comprise a transparent 1 mm inner diameter FEP tube threaded through the centre of an opaque Delrin cylinder, into which is drilled an orthogonal access port to allow insertion of a bifurcated fibre-optic. The fibre optic is used to channel excitation light from a 405 nm LED to the probe volume and to channel emitted light from the probe volume to a CCD spectrometer.

## Supplementary Note 1 | HSV Colour Space

In the *Hue, Saturation, Value* (HSV) colorimetry model, colour is represented as a cylindrical polar coordinate (see Supplementary Figure S2). The azimuthal angle, which varies from 0 to  $360^\circ$ , denotes the hue (or perceived colour) of the object; the radial coordinate, which varies from 0 to 1, denotes its saturation (or colour purity); and the axial coordinate denotes its value (or brightness).

The hue ( $H$ ) of individual droplets was obtained by taking RGB data (averaged from multiple pixels in the droplet) from movie stills and applying Supplementary Equation 1:<sup>1</sup>

$$H = \tan^{-1} \frac{\sqrt{3}(G - B)}{2R - G - B} \quad (1)$$

## Supplementary Reference

- 1 Hanbury, A. Constructing cylindrical coordinate colour spaces. *Pattern Recognition Letters* **29**, 494-500, doi:10.1016/j.patrec.2007.11.002 (2008).
